# Supplementary material for: Asbestosis in an asbestos composite mill at Mumbai: A prevalence study
Source: PubMed Central journal article supplement (PMC1289287; doi:10.1186/1476-069x-4-24), 2005-10-31
Supplement: 1476-069X-4-24-S1.pdf [file 1476-069X-4-24-S1.pdf]

**Chest radiograph classification format as per ILO classification**

|                                                                     |                    |   |   |   |                                                                                                                                      |                                                                                                                                                        |  |  |  |  |  |  |  |  |  |
|---------------------------------------------------------------------|--------------------|---|---|---|--------------------------------------------------------------------------------------------------------------------------------------|--------------------------------------------------------------------------------------------------------------------------------------------------------|--|--|--|--|--|--|--|--|--|
| Film Quality                                                        | Grade 1-4          |   |   |   | <table border="1"> <tr> <td></td> <td></td> </tr> <tr> <td></td> <td></td> </tr> </table>                                            |                                                                                                                                                        |  |  |  |  |  |  |  |  |  |
|                                                                     |                    |   |   |   |                                                                                                                                      |                                                                                                                                                        |  |  |  |  |  |  |  |  |  |
|                                                                     |                    |   |   |   |                                                                                                                                      |                                                                                                                                                        |  |  |  |  |  |  |  |  |  |
|                                                                     | Comment made (y/n) |   |   |   |                                                                                                                                      |                                                                                                                                                        |  |  |  |  |  |  |  |  |  |
| Small Opacities                                                     | Profusion          |   | R |   | L                                                                                                                                    | <table border="1"> <tr> <td></td> <td></td> <td></td> </tr> <tr> <td></td> <td></td> <td></td> </tr> <tr> <td></td> <td></td> <td></td> </tr> </table> |  |  |  |  |  |  |  |  |  |
|                                                                     |                    |   |   |   |                                                                                                                                      |                                                                                                                                                        |  |  |  |  |  |  |  |  |  |
|                                                                     |                    |   |   |   |                                                                                                                                      |                                                                                                                                                        |  |  |  |  |  |  |  |  |  |
|                                                                     |                    |   |   |   |                                                                                                                                      |                                                                                                                                                        |  |  |  |  |  |  |  |  |  |
|                                                                     |                    |   |   |   |                                                                                                                                      |                                                                                                                                                        |  |  |  |  |  |  |  |  |  |
|                                                                     | Shape and size     |   |   |   |                                                                                                                                      |                                                                                                                                                        |  |  |  |  |  |  |  |  |  |
| Large opacities                                                     | Presence (y/n)     |   |   |   | <table border="1"> <tr> <td></td> </tr> <tr> <td></td> </tr> </table>                                                                |                                                                                                                                                        |  |  |  |  |  |  |  |  |  |
|                                                                     |                    |   |   |   |                                                                                                                                      |                                                                                                                                                        |  |  |  |  |  |  |  |  |  |
|                                                                     |                    |   |   |   |                                                                                                                                      |                                                                                                                                                        |  |  |  |  |  |  |  |  |  |
|                                                                     | Size (A,B,C)       |   |   |   |                                                                                                                                      |                                                                                                                                                        |  |  |  |  |  |  |  |  |  |
| Pleural thickening<br>Chest wall<br>Circumscribed Presence<br>(y/n) |                    |   |   |   | <table border="1"> <tr> <td></td> </tr> </table> |                                                                                                                                                        |  |  |  |  |  |  |  |  |  |
|                                                                     |                    |   |   |   |                                                                                                                                      |                                                                                                                                                        |  |  |  |  |  |  |  |  |  |
|                                                                     |                    |   |   |   |                                                                                                                                      |                                                                                                                                                        |  |  |  |  |  |  |  |  |  |
|                                                                     |                    |   |   |   |                                                                                                                                      |                                                                                                                                                        |  |  |  |  |  |  |  |  |  |
|                                                                     |                    |   |   |   |                                                                                                                                      |                                                                                                                                                        |  |  |  |  |  |  |  |  |  |
|                                                                     |                    |   |   |   |                                                                                                                                      |                                                                                                                                                        |  |  |  |  |  |  |  |  |  |
|                                                                     |                    | R |   | L |                                                                                                                                      |                                                                                                                                                        |  |  |  |  |  |  |  |  |  |
|                                                                     | Face on (y/n)      |   |   |   |                                                                                                                                      |                                                                                                                                                        |  |  |  |  |  |  |  |  |  |
|                                                                     | Width (a,b,c)      |   |   |   |                                                                                                                                      |                                                                                                                                                        |  |  |  |  |  |  |  |  |  |
|                                                                     | Extent (1,2,3)     |   |   |   |                                                                                                                                      |                                                                                                                                                        |  |  |  |  |  |  |  |  |  |
| Pleural thickening<br>Chest wall Diffuse<br>Presence (y/n)          |                    |   |   |   | <table border="1"> <tr> <td></td> </tr> </table> |                                                                                                                                                        |  |  |  |  |  |  |  |  |  |
|                                                                     |                    |   |   |   |                                                                                                                                      |                                                                                                                                                        |  |  |  |  |  |  |  |  |  |
|                                                                     |                    |   |   |   |                                                                                                                                      |                                                                                                                                                        |  |  |  |  |  |  |  |  |  |
|                                                                     |                    |   |   |   |                                                                                                                                      |                                                                                                                                                        |  |  |  |  |  |  |  |  |  |
|                                                                     |                    |   |   |   |                                                                                                                                      |                                                                                                                                                        |  |  |  |  |  |  |  |  |  |
|                                                                     |                    |   |   |   |                                                                                                                                      |                                                                                                                                                        |  |  |  |  |  |  |  |  |  |
|                                                                     |                    | R |   | L |                                                                                                                                      |                                                                                                                                                        |  |  |  |  |  |  |  |  |  |
|                                                                     | Face on (y/n)      |   |   |   |                                                                                                                                      |                                                                                                                                                        |  |  |  |  |  |  |  |  |  |
|                                                                     | Width (a,b,c)      |   |   |   |                                                                                                                                      |                                                                                                                                                        |  |  |  |  |  |  |  |  |  |
|                                                                     | Extent (1,2,3)     |   |   |   |                                                                                                                                      |                                                                                                                                                        |  |  |  |  |  |  |  |  |  |
| Pleural thickening<br>(Diaphragm)                                   | Presence (y/n)     |   |   |   | <table border="1"> <tr> <td></td> </tr> <tr> <td></td> </tr> <tr> <td></td> </tr> </table>                                           |                                                                                                                                                        |  |  |  |  |  |  |  |  |  |
|                                                                     |                    |   |   |   |                                                                                                                                      |                                                                                                                                                        |  |  |  |  |  |  |  |  |  |
|                                                                     |                    |   |   |   |                                                                                                                                      |                                                                                                                                                        |  |  |  |  |  |  |  |  |  |
|                                                                     |                    |   |   |   |                                                                                                                                      |                                                                                                                                                        |  |  |  |  |  |  |  |  |  |
|                                                                     | R                  | L |   |   |                                                                                                                                      |                                                                                                                                                        |  |  |  |  |  |  |  |  |  |
|                                                                     |                    |   |   |   |                                                                                                                                      |                                                                                                                                                        |  |  |  |  |  |  |  |  |  |
| Costophrenic Angle<br>Obliteration                                  | Presence (y/n)     |   |   |   | <table border="1"> <tr> <td></td> </tr> <tr> <td></td> </tr> <tr> <td></td> </tr> </table>                                           |                                                                                                                                                        |  |  |  |  |  |  |  |  |  |
|                                                                     |                    |   |   |   |                                                                                                                                      |                                                                                                                                                        |  |  |  |  |  |  |  |  |  |
|                                                                     |                    |   |   |   |                                                                                                                                      |                                                                                                                                                        |  |  |  |  |  |  |  |  |  |
|                                                                     |                    |   |   |   |                                                                                                                                      |                                                                                                                                                        |  |  |  |  |  |  |  |  |  |
|                                                                     | R                  | L |   |   |                                                                                                                                      |                                                                                                                                                        |  |  |  |  |  |  |  |  |  |
|                                                                     |                    |   |   |   |                                                                                                                                      |                                                                                                                                                        |  |  |  |  |  |  |  |  |  |
| Pleural Calcification                                               | Presence (y/n)     |   |   |   |                                                                                                                                      |                                                                                                                                                        |  |  |  |  |  |  |  |  |  |
| Chest wall<br>Diaphragm<br>Other<br>Extent (1,2,3)                  | R                  |   | L |   | <table border="1"> <tr> <td></td> </tr> <tr> <td></td> </tr> <tr> <td></td> </tr> <tr> <td></td> </tr> </table>                      |                                                                                                                                                        |  |  |  |  |  |  |  |  |  |
|                                                                     |                    |   |   |   |                                                                                                                                      |                                                                                                                                                        |  |  |  |  |  |  |  |  |  |
|                                                                     |                    |   |   |   |                                                                                                                                      |                                                                                                                                                        |  |  |  |  |  |  |  |  |  |
|                                                                     |                    |   |   |   |                                                                                                                                      |                                                                                                                                                        |  |  |  |  |  |  |  |  |  |
|                                                                     |                    |   |   |   |                                                                                                                                      |                                                                                                                                                        |  |  |  |  |  |  |  |  |  |
|                                                                     |                    |   |   |   |                                                                                                                                      |                                                                                                                                                        |  |  |  |  |  |  |  |  |  |
|                                                                     |                    |   |   |   |                                                                                                                                      |                                                                                                                                                        |  |  |  |  |  |  |  |  |  |
|                                                                     |                    |   |   |   |                                                                                                                                      |                                                                                                                                                        |  |  |  |  |  |  |  |  |  |
| Symbols                                                             | Used (y/n)         |   |   |   |                                                                                                                                      |                                                                                                                                                        |  |  |  |  |  |  |  |  |  |
|                                                                     |                    |   |   |   |                                                                                                                                      |                                                                                                                                                        |  |  |  |  |  |  |  |  |  |
|                                                                     |                    |   |   |   |                                                                                                                                      |                                                                                                                                                        |  |  |  |  |  |  |  |  |  |
| Comments                                                            | Made (y/n)         |   |   |   |                                                                                                                                      |                                                                                                                                                        |  |  |  |  |  |  |  |  |  |
