# Supplementary material for: Asbestosis in an asbestos composite mill at Mumbai: A prevalence study
Source: PubMed Central journal article supplement (PMC1289287; doi:10.1186/1476-069x-4-24), 2005-10-31
Supplement: 1476-069X-4-24-S2.pdf [file 1476-069X-4-24-S2.pdf]

**Impairment Assessment guidelines used for calculating pulmonary disability of affected workers.**

|                               | Class I<br>Upto 25%<br>Impairment                                | Class II<br>26% - 50%                                                                                                                                                                                                                     | Class III<br>51% - 75%                                                                                                                                                                                                                        | Class IV<br>76% - 100%                                                                                                              |
|-------------------------------|------------------------------------------------------------------|-------------------------------------------------------------------------------------------------------------------------------------------------------------------------------------------------------------------------------------------|-----------------------------------------------------------------------------------------------------------------------------------------------------------------------------------------------------------------------------------------------|-------------------------------------------------------------------------------------------------------------------------------------|
| Dyspnoea                      | When it occurs, is consistent with the circumstances of activity | Does not occur at rest and seldom occurs during the performance of the usual activities of daily living. The patient can keep pace with persons of same age and body built on the level without breathlessness but not on hills or stairs | Does not occur at rest but does occur during the usual activities of daily living. However, the patient can walk a mile at his own pace without dyspnoea although he cannot keep pace on the level with others of the same age and body build | Occurs during such activities as climbing one flight of stairs or walking 100 yards on the level, on less exertion, or even at rest |
| FEV <sub>1</sub>              | > 80% of predicted                                               | 60- 79% of predicted                                                                                                                                                                                                                      | 51 – 59% of predicted                                                                                                                                                                                                                         | < 50% of predicted                                                                                                                  |
|                               | AND                                                              | OR                                                                                                                                                                                                                                        | OR                                                                                                                                                                                                                                            | OR                                                                                                                                  |
| FVC                           | > 80% of predicted                                               | 60 – 79% of predicted                                                                                                                                                                                                                     | 51 – 59% of predicted                                                                                                                                                                                                                         | < 50% of predicted                                                                                                                  |
|                               | AND                                                              | OR                                                                                                                                                                                                                                        | OR                                                                                                                                                                                                                                            | OR                                                                                                                                  |
| (FEV <sub>1</sub> /FVC) x 100 | > 75% of predicted                                               | 60 – 74% of predicted                                                                                                                                                                                                                     | 41 – 59% of predicted                                                                                                                                                                                                                         | < 40% of predicted                                                                                                                  |
